# Supplementary material
Source: Springer Nature journal article supplement (https://www.springermedizin.de/resource/supplementary/13013_2009_142_MOESM2_ESM.pdf/9631256)

### ***Step by step approach we used at the start of the study***

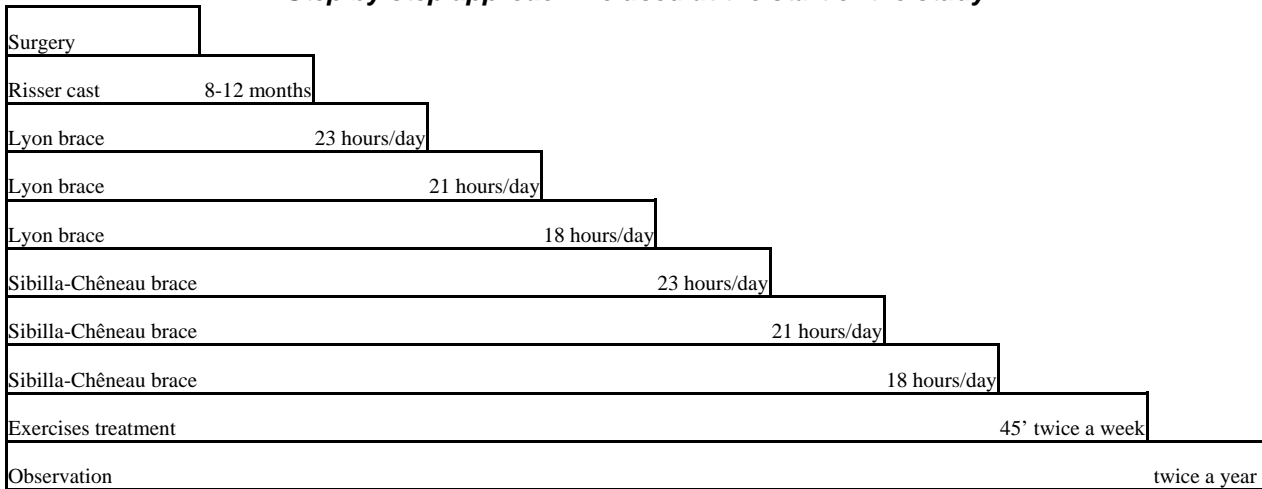

### ***Step by step approach we use today***

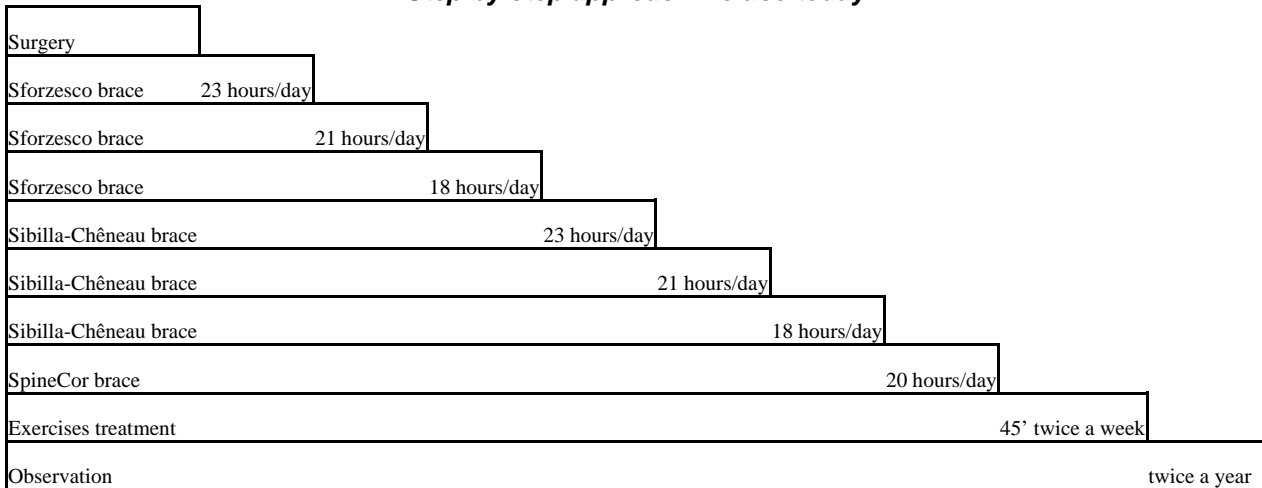

Supplement: MOESM2 [file 9631256]
